# Supplementary material for: In situ syntheses, crystal structures and magnetic properties of CuIIand MnIIcoordination assemblies based on a novel heteroalicyclic dicarboxylate tecton and N-donor co-ligands
Source: Royal Society of Chemistry journal article supplement (doi:10.1039/c1ce06015e), 2011-11-11
Supplement: c1ce06015e.pdf [file c1ce06015e.pdf]

## ***Electronic Supplementary Information (ESI)***

### ***In situ* syntheses, crystal structures and magnetic properties of Cu<sup>II</sup> and Mn<sup>II</sup> coordination assemblies based on a novel heteroalicyclic dicarboxylate tecton and N-donor co-ligands<sup>†</sup>**

**Chun-Sen Liu,<sup>a</sup> Wei Guo,<sup>b</sup> E. Carolina Sañudo,<sup>c</sup> Min Chen,<sup>a</sup> Min Hu,<sup>a</sup> Miao Du<sup>\*,b</sup> and  
Shao-Ming Fang<sup>\*,a</sup>**

<sup>a</sup> Zhengzhou University of Light Industry, Henan Provincial Key Laboratory of Surface & Interface Science,  
Zhengzhou, Henan 450002, P. R. China. E-mail: smfang@zzuli.edu.cn (S.-M.F.)

<sup>b</sup> College of Chemistry, Tianjin Key Laboratory of Structure and Performance for Functional Molecule, Tianjin  
Normal University, Tianjin 300387, P. R. China. E-mail: dumiao@public.tpt.tj.cn (M.D.)

<sup>c</sup> Institut de Nanociència i Nanotecnologia i Departament de Química Inorgànica, Universitat de Barcelona,  
Diagonal, 647, 08028-Barcelona, Spain

**CrystEngComm**

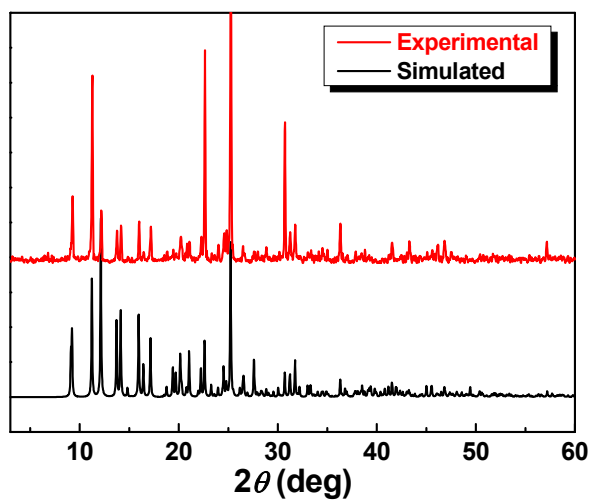

(a)

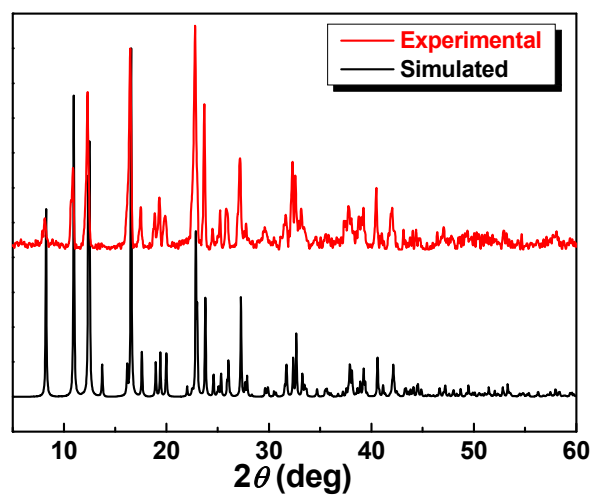

(b)

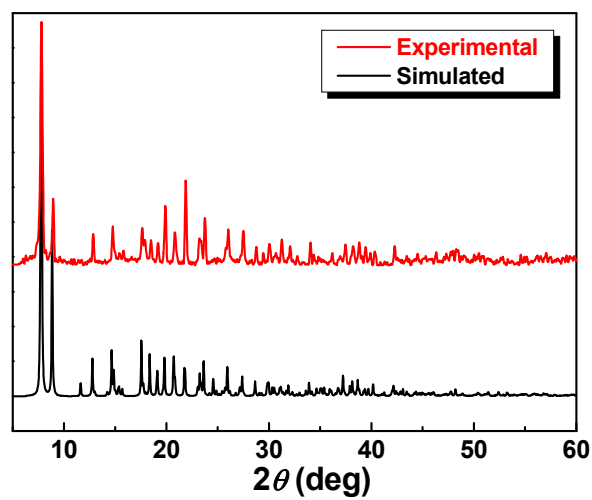

(c)

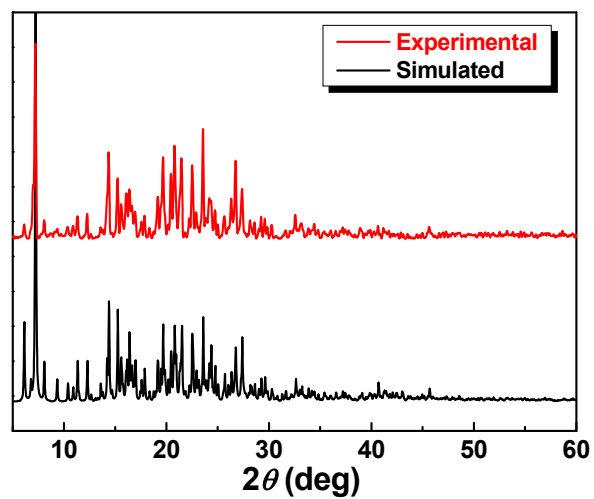

(d)

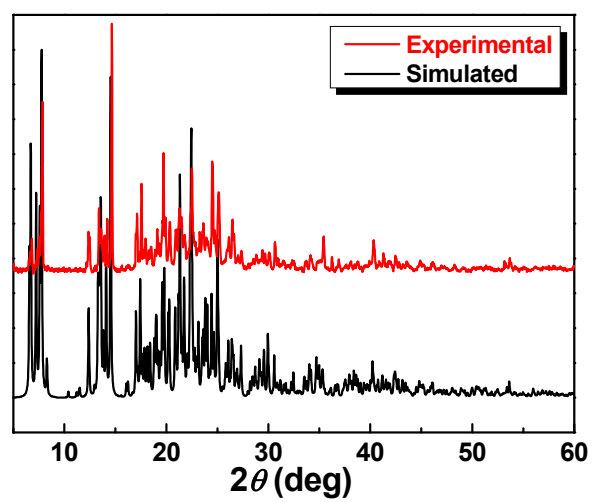

(e)

Fig. S1 PXRD patterns of (a) 1, (b) 2, (c) 3, (d) 4, and (e) 5.

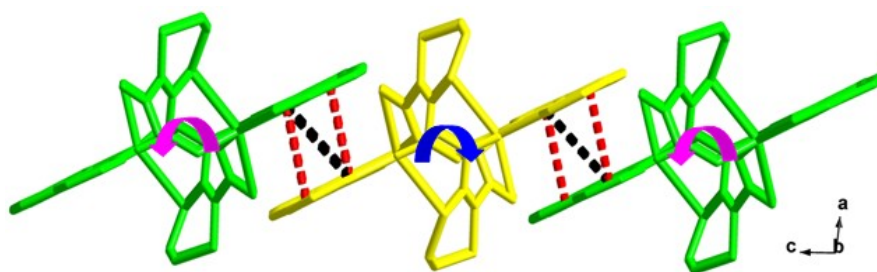

**Fig. S2** The 2-D achiral network *via* aromatic interactions between the helical chains in **1**.

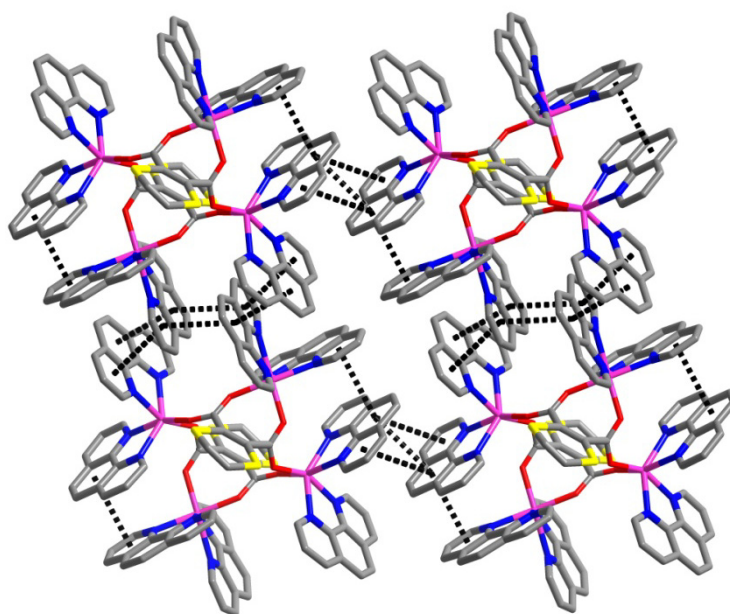

**Fig. S3** The 2-D layer *via* multiple stacking interactions in **4**.

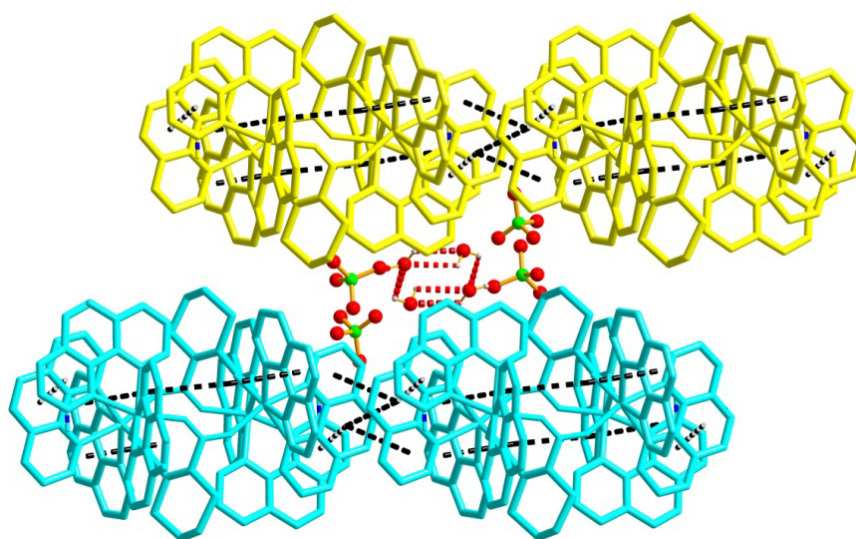

**Fig. S4** Parallel stacking mode of the 2-D nets with hexameric units inset in **4**.

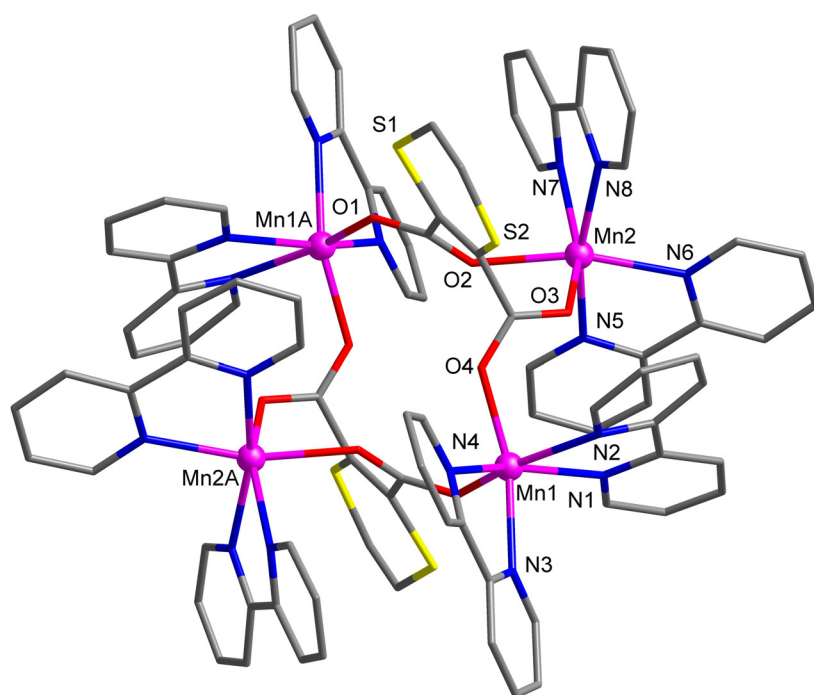

**Fig. S5** The local coordination environments of Mn<sup>II</sup> in **5** (symmetry code: A =  $-x + 1, y + 1, -z$ ).

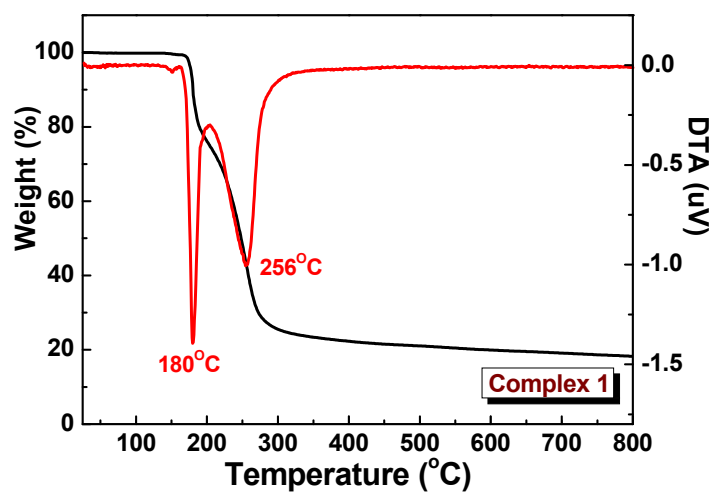

(a)

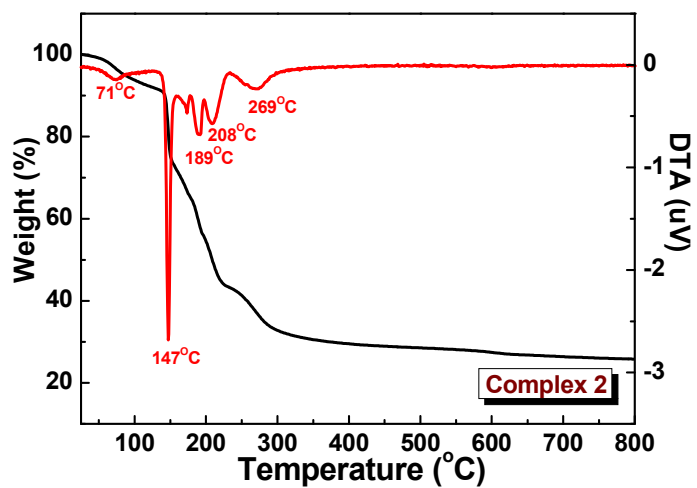

(b)

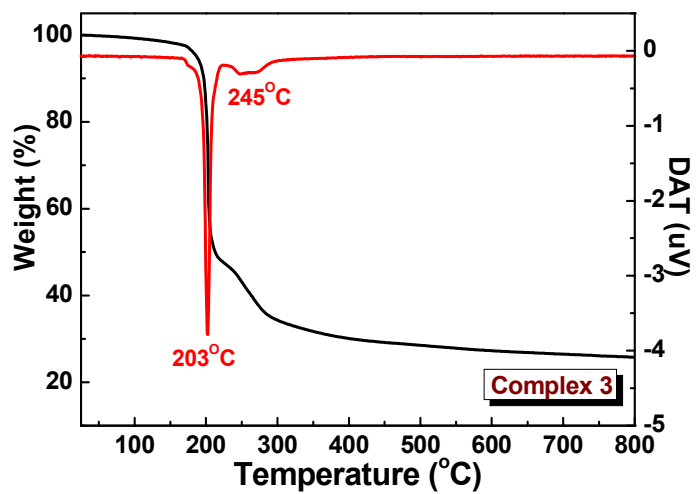

(c)



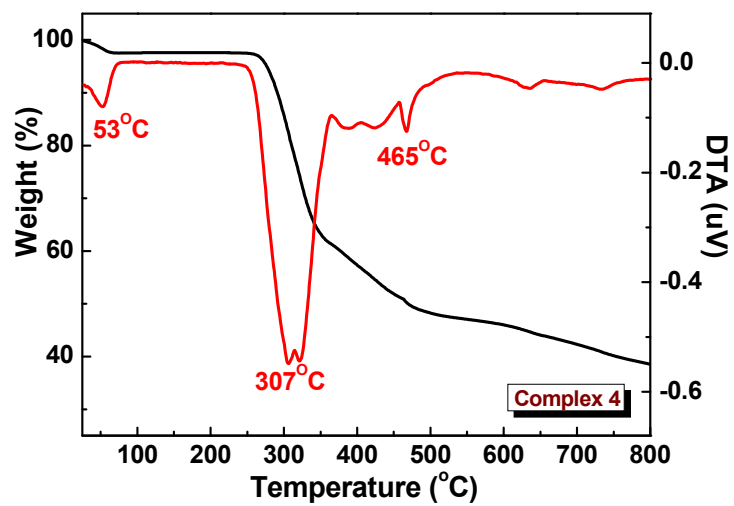

(d)

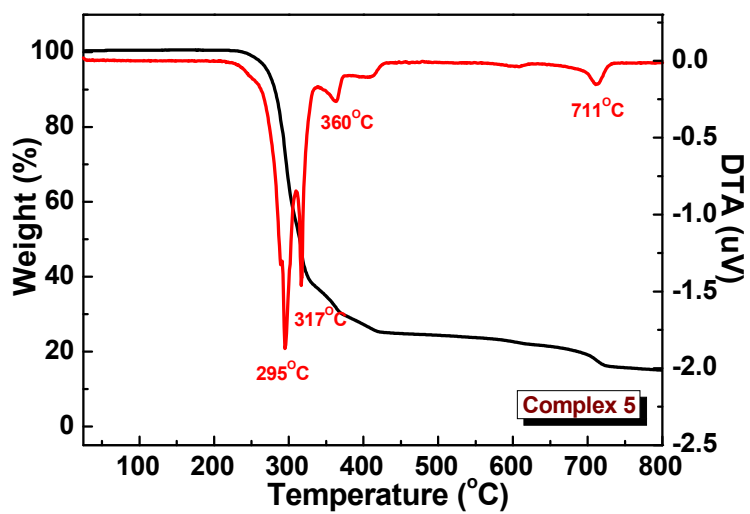

(e)

Fig. S6 TG-DTA curves of 1–5 (a–e).

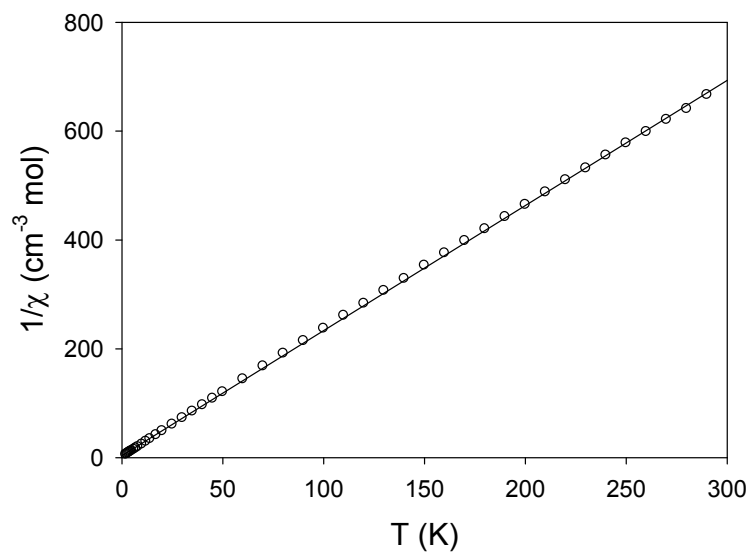

**Fig. S7** Curie plot for **1**. The solid line is the best fitting to the Curie-Weiss law (see the text for fitting parameters).

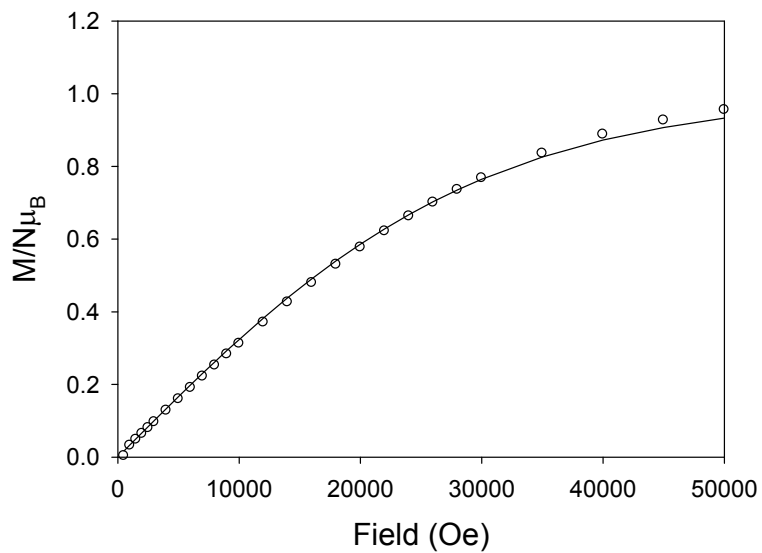

**Fig. S8** Magnetization vs. field plot for **1** at 2 K. The solid line is the Brillouin function for  $S = 1/2$  and  $g = 2.0$ .

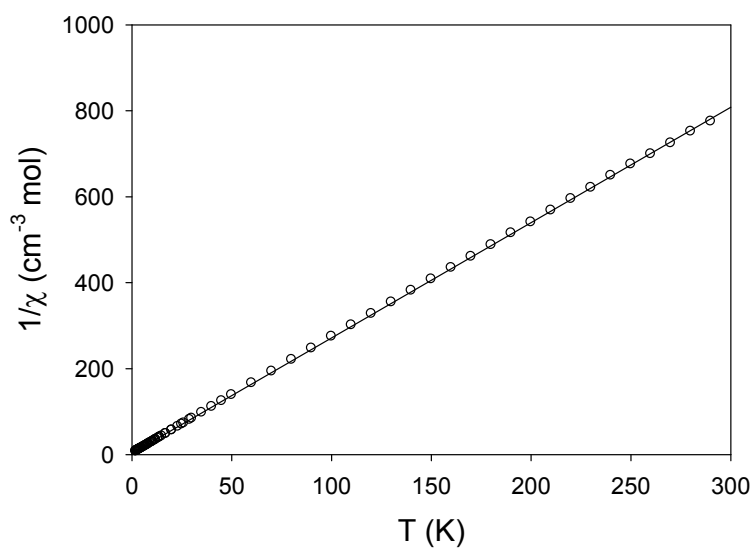

**Fig. S9** Curie plot for **2**. The solid line is the best fitting to the Curie-Weiss law (see text for fitting parameters).

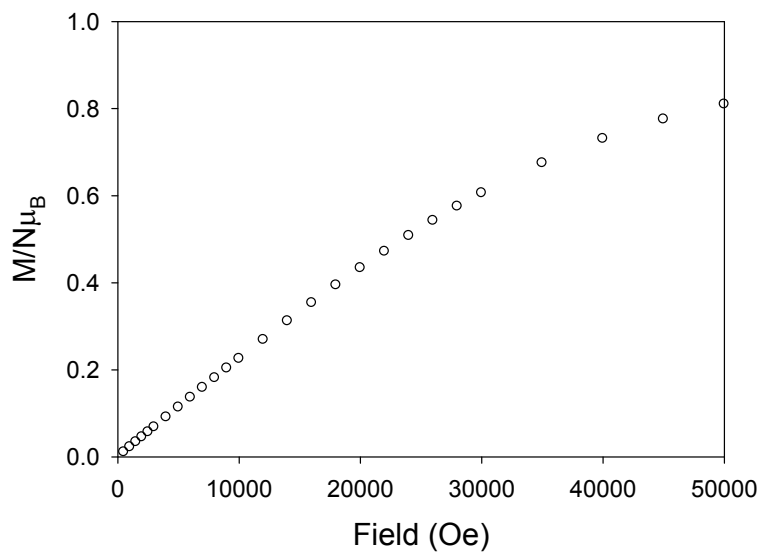

**Fig. S10** Magnetization vs. field plot for **2** at 2 K.

**Table S1** Selected bond distances (Å) and angles (°) for **1–5**.

| <b>1</b>                                                    |            |                                        |            |
|-------------------------------------------------------------|------------|----------------------------------------|------------|
| Cu1–O4 <sup>#1</sup>                                        | 1.9313(17) | Cu1–N1                                 | 2.007(2)   |
| Cu1–O1                                                      | 1.9547(17) | Cu1–N2                                 | 2.013(2)   |
| Cu1–O2                                                      | 2.6799(23) | Cu1–S1 <sup>#1</sup>                   | 2.7690(8)  |
| O4 <sup>#1</sup> –Cu1–O1                                    | 88.86(7)   | N1–Cu1–N2                              | 81.81(8)   |
| O4 <sup>#1</sup> –Cu1–N1                                    | 175.26(8)  | O4 <sup>#1</sup> –Cu1–S1 <sup>#1</sup> | 80.20(6)   |
| O1–Cu1–N1                                                   | 94.88(8)   | O1–Cu1–S1 <sup>#1</sup>                | 91.73(6)   |
| O4 <sup>#1</sup> –Cu1–N2                                    | 94.16(8)   | N1–Cu1–S1 <sup>#1</sup>                | 102.56(6)  |
| O1–Cu1–N2                                                   | 173.18(8)  | N2–Cu1–S1 <sup>#1</sup>                | 94.80(6)   |
| Symmetry code: #1 = -x + 2, y - 1/2, -z + 1/2.              |            |                                        |            |
| <b>2</b>                                                    |            |                                        |            |
| Cu1–O1                                                      | 1.928(6)   | Cu1–N1                                 | 2.019(7)   |
| Cu1–O4 <sup>#1</sup>                                        | 1.965(7)   | Cu1–N2 <sup>#2</sup>                   | 2.037(6)   |
| Cu1–O5                                                      | 2.8070(78) | Cu1–S1 <sup>#1</sup>                   | 2.756(3)   |
| O1–Cu1–O4 <sup>#1</sup>                                     | 171.3(3)   | N1–Cu1–N2 <sup>#2</sup>                | 178.0(4)   |
| O1–Cu1–N1                                                   | 93.0(3)    | O1–Cu1–S1 <sup>#1</sup>                | 95.7(2)    |
| O4 <sup>#1</sup> –Cu1–N1                                    | 93.3(3)    | O4 <sup>#1</sup> –Cu1–S1 <sup>#1</sup> | 78.2(2)    |
| O1–Cu1–N2 <sup>#2</sup>                                     | 86.7(3)    | N1–Cu1–S1 <sup>#1</sup>                | 89.8(2)    |
| O4 <sup>#1</sup> –Cu1–N2 <sup>#2</sup>                      | 87.3(3)    | N2 <sup>#2</sup> –Cu1–S1 <sup>#1</sup> | 92.2(2)    |
| Symmetry codes: #1 = x, y, z - 1; #2 = x - 1/2, y - 1/2, z. |            |                                        |            |
| <b>3</b>                                                    |            |                                        |            |
| Cu1–O1                                                      | 1.902(2)   | Cu2–O6 <sup>#2</sup>                   | 1.918(2)   |
| Cu1–O9                                                      | 1.9132(19) | Cu2–O9                                 | 1.9359(18) |
| Cu1–O5                                                      | 2.040(2)   | Cu2–O9 <sup>#2</sup>                   | 1.9481(17) |
| Cu1–O7 <sup>#1</sup>                                        | 2.0505(19) | Cu2–O4 <sup>#1</sup>                   | 2.317(4)   |
| Cu2–O8 <sup>#1</sup>                                        | 1.916(2)   |                                        |            |
| O1–Cu1–O9                                                   | 172.39(9)  | O6 <sup>#2</sup> –Cu2–O9               | 172.91(10) |
| O1–Cu1–O5                                                   | 90.52(9)   | O8 <sup>#1</sup> –Cu2–O9 <sup>#2</sup> | 175.64(9)  |

|                                        |           |                                        |           |
|----------------------------------------|-----------|----------------------------------------|-----------|
| O9–Cu1–O5                              | 90.27(8)  | O6 <sup>#2</sup> –Cu2–O9 <sup>#2</sup> | 94.01(8)  |
| O1–Cu1–O7 <sup>#1</sup>                | 93.05(8)  | O9–Cu2–O9 <sup>#2</sup>                | 83.89(8)  |
| O9–Cu1–O7 <sup>#1</sup>                | 91.02(8)  | O8 <sup>#1</sup> –Cu2–O4 <sup>#1</sup> | 94.79(12) |
| O5–Cu1–O7 <sup>#1</sup>                | 141.60(9) | O6 <sup>#2</sup> –Cu2–O4 <sup>#1</sup> | 97.15(12) |
| O8 <sup>#1</sup> –Cu2–O6 <sup>#2</sup> | 88.63(9)  | O9–Cu2–O4 <sup>#1</sup>                | 89.58(11) |
| O8 <sup>#1</sup> –Cu2–O9               | 93.08(8)  | O9 <sup>#2</sup> –Cu2–O4 <sup>#1</sup> | 88.34(11) |

Symmetry codes: #1 =  $-x + 2, -y, -z$ ; #2 =  $-x + 3, -y, -z$ .

4

|                          |            |           |            |
|--------------------------|------------|-----------|------------|
| Mn1–O4 <sup>#1</sup>     | 2.114(3)   | Mn2–O1    | 2.099(3)   |
| Mn1–O2                   | 2.133(3)   | Mn2–O3    | 2.138(4)   |
| Mn1–N1                   | 2.253(4)   | Mn2–N7    | 2.232(4)   |
| Mn1–N4                   | 2.283(4)   | Mn2–N8    | 2.232(4)   |
| Mn1–N2                   | 2.318(4)   | Mn2–N5    | 2.242(4)   |
| Mn1–N3                   | 2.329(4)   | Mn2–N6    | 2.337(4)   |
| O4 <sup>#1</sup> –Mn1–O2 | 92.52(12)  | O1–Mn2–O3 | 85.94(14)  |
| O4 <sup>#1</sup> –Mn1–N1 | 88.94(14)  | O1–Mn2–N7 | 102.05(14) |
| O2–Mn1–N1                | 120.52(13) | O3–Mn2–N7 | 87.80(15)  |
| O4 <sup>#1</sup> –Mn1–N4 | 114.41(14) | O1–Mn2–N8 | 95.68(14)  |
| O2–Mn1–N4                | 84.48(14)  | O3–Mn2–N8 | 162.22(14) |
| N1–Mn1–N4                | 145.97(15) | N7–Mn2–N8 | 74.53(16)  |
| O4 <sup>#1</sup> –Mn1–N2 | 160.50(15) | O1–Mn2–N5 | 96.35(14)  |
| O2–Mn1–N2                | 92.41(13)  | O3–Mn2–N5 | 96.77(13)  |
| N1–Mn1–N2                | 72.34(16)  | N7–Mn2–N5 | 161.32(15) |
| N4–Mn1–N2                | 84.85(15)  | N8–Mn2–N5 | 100.63(15) |
| O4 <sup>#1</sup> –Mn1–N3 | 87.03(13)  | O1–Mn2–N6 | 168.65(14) |
| O2–Mn1–N3                | 153.22(14) | O3–Mn2–N6 | 96.10(13)  |
| N1–Mn1–N3                | 86.25(14)  | N7–Mn2–N6 | 89.19(14)  |
| N4–Mn1–N3                | 71.48(15)  | N8–Mn2–N6 | 85.79(13)  |
| N2–Mn1–N3                | 96.89(13)  | N5–Mn2–N6 | 72.34(14)  |

Symmetry code: #1 =  $-x, -y + 2, -z$ .

5

|                          |            |           |            |
|--------------------------|------------|-----------|------------|
| Mn1–O1                   | 2.099(2)   | Mn2–O3    | 2.135(2)   |
| Mn1–O4 <sup>#1</sup>     | 2.099(2)   | Mn2–O2    | 2.176(2)   |
| Mn1–N1                   | 2.252(3)   | Mn2–N5    | 2.237(2)   |
| Mn1–N3                   | 2.268(3)   | Mn2–N6    | 2.247(3)   |
| Mn1–N4                   | 2.283(3)   | Mn2–N7    | 2.271(3)   |
| Mn1–N2                   | 2.386(2)   | Mn2–N8    | 2.278(2)   |
| O1–Mn1–O4 <sup>#1</sup>  | 96.43(8)   | O3–Mn2–O2 | 83.98(8)   |
| O1–Mn1–N1                | 88.49(9)   | O3–Mn2–N5 | 97.08(9)   |
| O4 <sup>#1</sup> –Mn1–N1 | 106.87(9)  | O2–Mn2–N5 | 86.90(8)   |
| O1–Mn1–N3                | 92.18(9)   | O3–Mn2–N6 | 99.41(9)   |
| O4 <sup>#1</sup> –Mn1–N3 | 157.05(10) | O2–Mn2–N6 | 159.53(8)  |
| N1–Mn1–N3                | 94.56(10)  | N5–Mn2–N6 | 72.66(9)   |
| O1–Mn1–N4                | 115.39(9)  | O3–Mn2–N7 | 153.37(9)  |
| O4 <sup>#1</sup> –Mn1–N4 | 85.36(9)   | O2–Mn2–N7 | 82.19(9)   |
| N1–Mn1–N4                | 152.22(10) | N5–Mn2–N7 | 104.76(10) |
| N3–Mn1–N4                | 71.73(10)  | N6–Mn2–N7 | 101.49(9)  |
| O1–Mn1–N2                | 159.40(9)  | O3–Mn2–N8 | 90.27(9)   |
| O4 <sup>#1</sup> –Mn1–N2 | 87.00(8)   | O2–Mn2–N8 | 105.31(8)  |
| N1–Mn1–N2                | 71.12(9)   | N5–Mn2–N8 | 166.39(9)  |
| N3–Mn1–N2                | 92.39(9)   | N6–Mn2–N8 | 94.89(9)   |
| N4–Mn1–N2                | 85.09(9)   | N7–Mn2–N8 | 71.72(10)  |

Symmetry code: #1 =  $-x + 1, y - 1, -z$ .

---

**Table S2** Hydrogen-bonding geometry (Å, °) for complexes **2–4**.

| <b>D–H...A</b>                                                       | <b><i>d</i>(D–H)</b> | <b><i>d</i>(H...A)</b> | <b><i>d</i>(H...A)</b> | <b>D–H...A</b> |
|----------------------------------------------------------------------|----------------------|------------------------|------------------------|----------------|
|                                                                      |                      | <b>2</b>               |                        |                |
| O5–H1W...O2                                                          | 0.85                 | 2.22                   | 2.797                  | 125            |
|                                                                      |                      | <b>3</b>               |                        |                |
| O10–H2W...O8                                                         | 0.85                 | 2.24                   | 2.971                  | 144            |
| O9–H9...O2 <sup>#1</sup>                                             | 0.98                 | 1.57                   | 2.546                  | 173            |
| Symmetry code: #1 = $-x + 2, -y, -z$ .                               |                      |                        |                        |                |
|                                                                      |                      | <b>4</b>               |                        |                |
| O1W–H1W...O2W <sup>#1</sup>                                          | 0.85                 | 2.36                   | 2.728                  | 107            |
| O1W–H2W...O7                                                         | 0.85                 | 2.57                   | 3.116                  | 123            |
| O2W–H3W...O1W <sup>#1</sup>                                          | 0.85                 | 2.37                   | 2.728                  | 106            |
| O2W–H4W...O1W <sup>#2</sup>                                          | 0.85                 | 2.27                   | 2.708                  | 112            |
| Symmetry codes: #1 = $-x + 1, -y + 1, -z + 1$ ; #2 = $x - 1, y, z$ . |                      |                        |                        |                |
